# Supplementary material for: A dataset of 30 m annual vegetation phenology indicators (1985–2015) in urban areas of the conterminous United States
Source: Copernicus journal article supplement (doi:10.5194/essd-11-881-2019), 2019-06-21
Supplement: Supplementary file 1 [file essd-11-881-2019-supplement.pdf]

Supplement of Earth Syst. Sci. Data, 11, 881–894, 2019  
<https://doi.org/10.5194/essd-11-881-2019-supplement>  
© Author(s) 2019. This work is distributed under  
the Creative Commons Attribution 4.0 License.

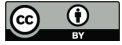

*Supplement of*

## **A dataset of 30 m annual vegetation phenology indicators (1985–2015) in urban areas of the conterminous United States**

**Xuecao Li et al.**

*Correspondence to:* Yuyu Zhou (yuyuzhou@iastate.edu)

The copyright of individual parts of the supplement might differ from the CC BY 4.0 License.

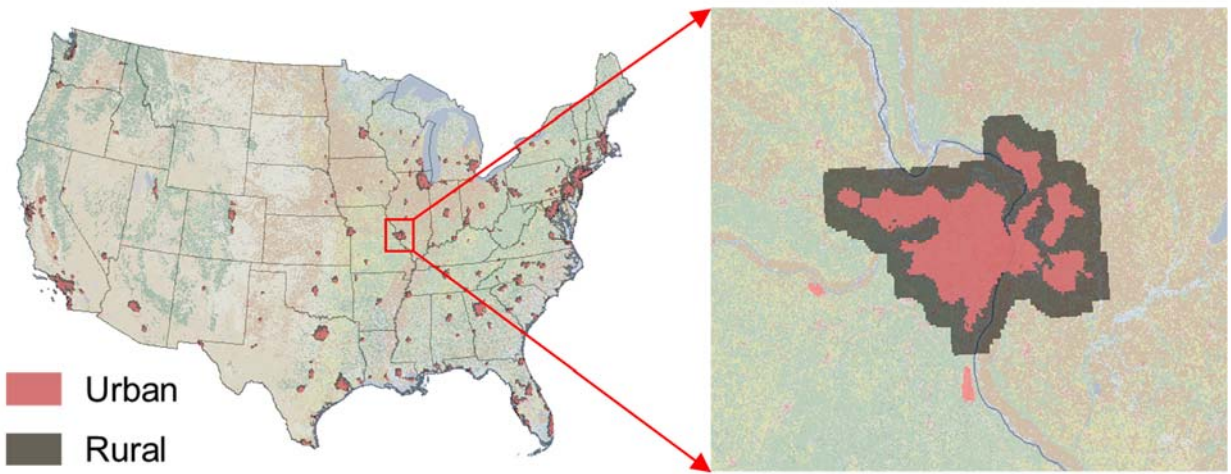

**Fig. S1.** Urban and surrounding rural areas in this study.

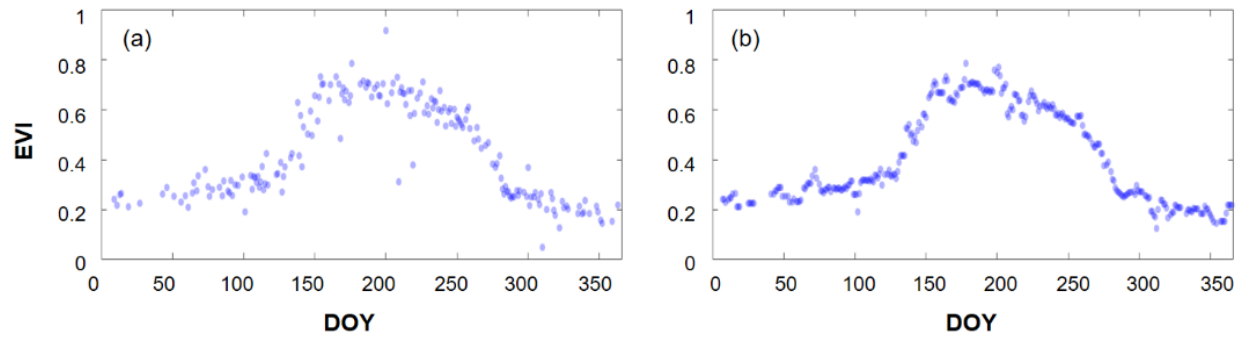

**Fig. S2.** Comparison of the raw (a) and smoothed (b) EVI time series for a specific site in a forest ecosystem from 1985 to 2015 (*Latitude: 41.16337397°N, Longitude: 77.93396473°W*).

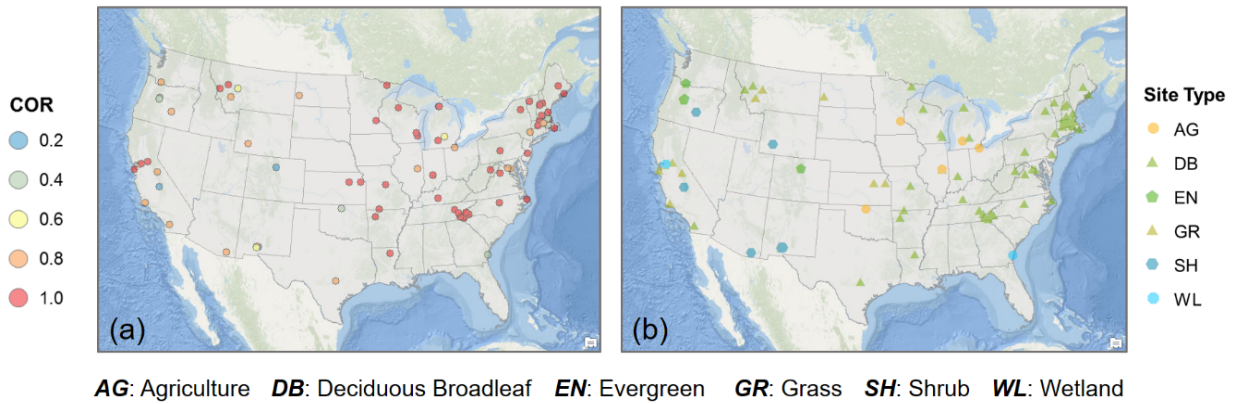

**Fig. S3.** The correlation coefficient (COR) of the raw and fitted EVIs using the fitting of the double logistic model (a) and land cover types (b) in PhenoCam stations. PhenoCam stations were derived from <https://phenocam.sr.unh.edu/webcam/network/map/>.
